# Supplementary material
Source: Springer Nature journal article supplement (https://www.springermedizin.de/resource/supplementary/12936_2006_211_MOESM5_ESM.pdf/9547186)

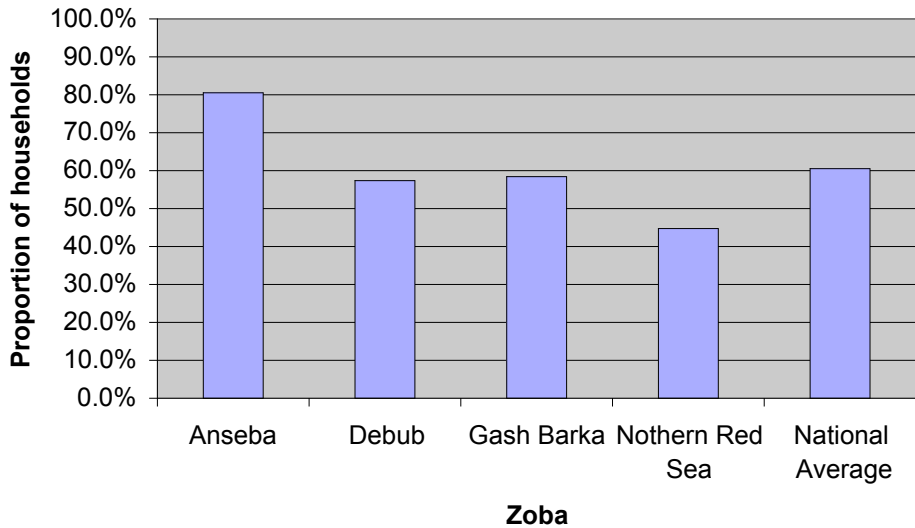

Supplement: MOESM5 [file 9547186]
